# Supplementary figures and images for: Metabolic reprogramming during neuronal differentiation
Source: PubMed Central journal article supplement — Cell Death Differ. 2016 Apr 8;23(9):1502–14. doi: 10.1038/cdd.2016.36 (PMC5072427; doi:10.1038/cdd.2016.36), 2016-04-08

**a**

**P5**

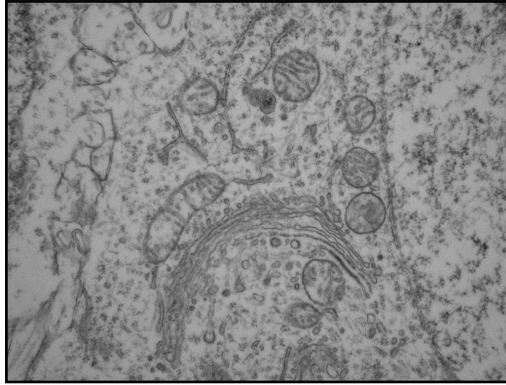

**P15**

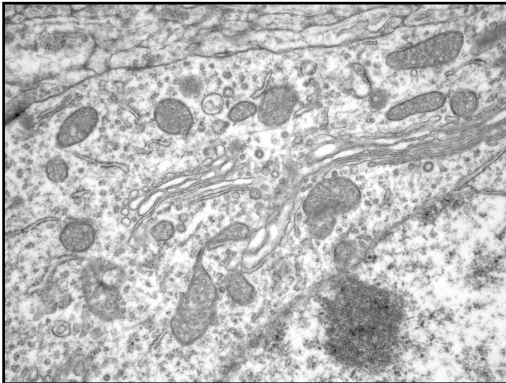

**P30**

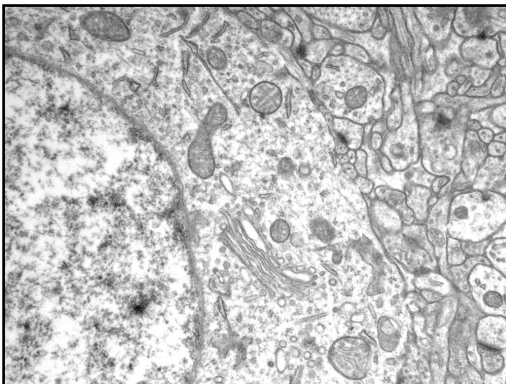

**b**

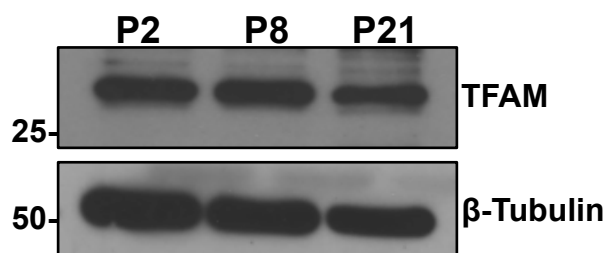

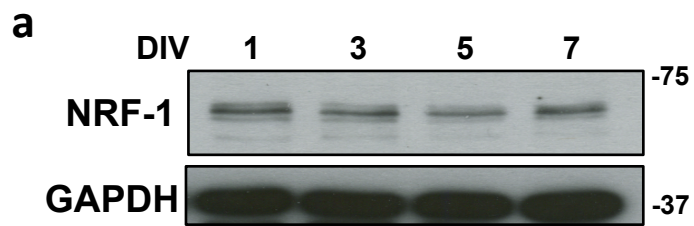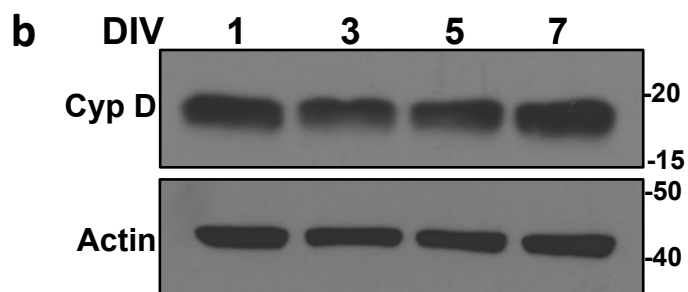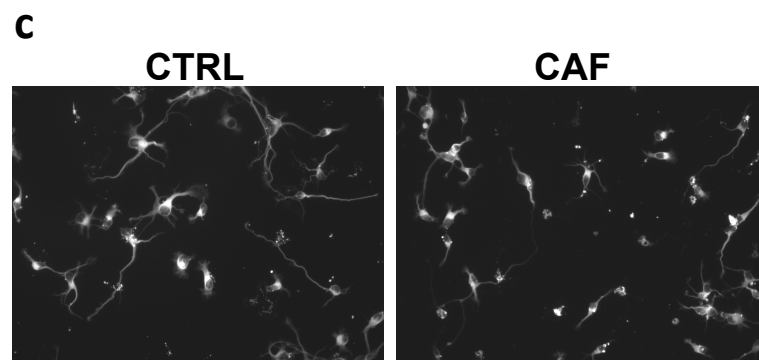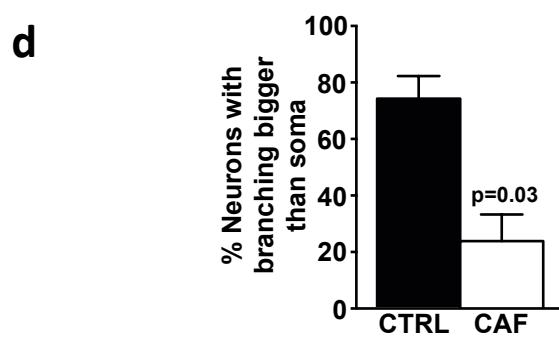

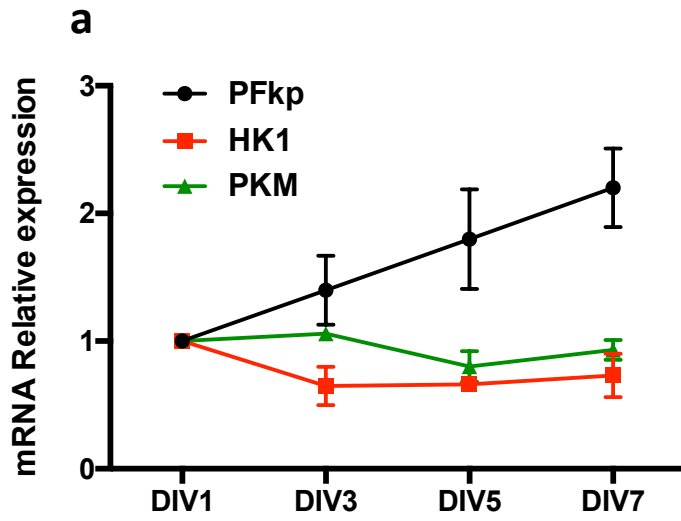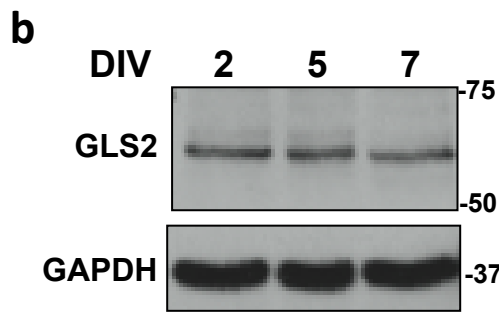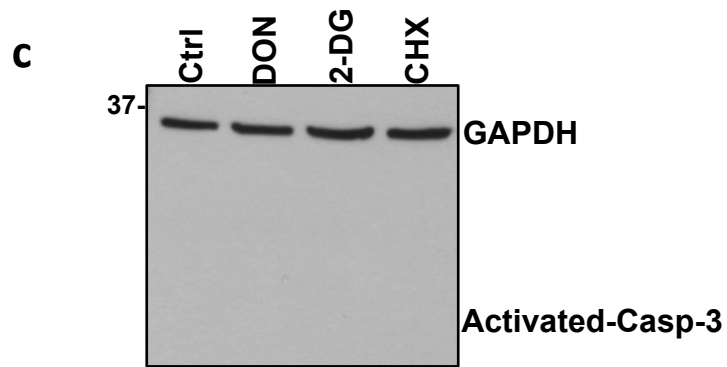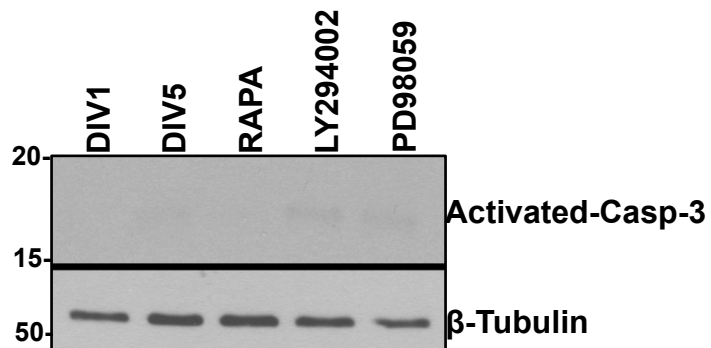

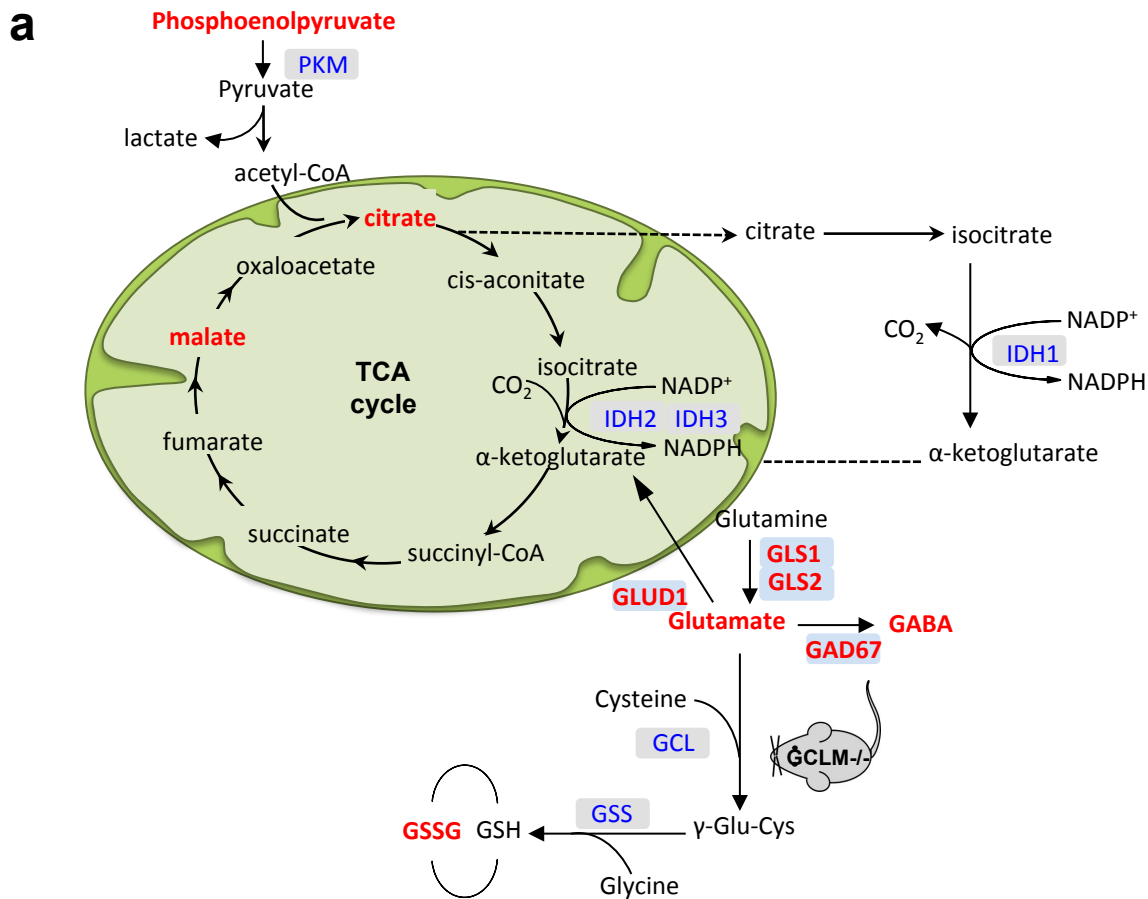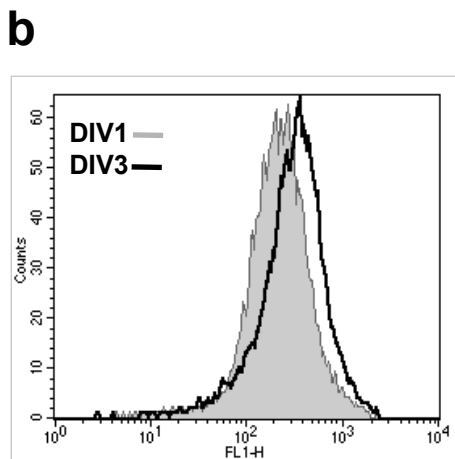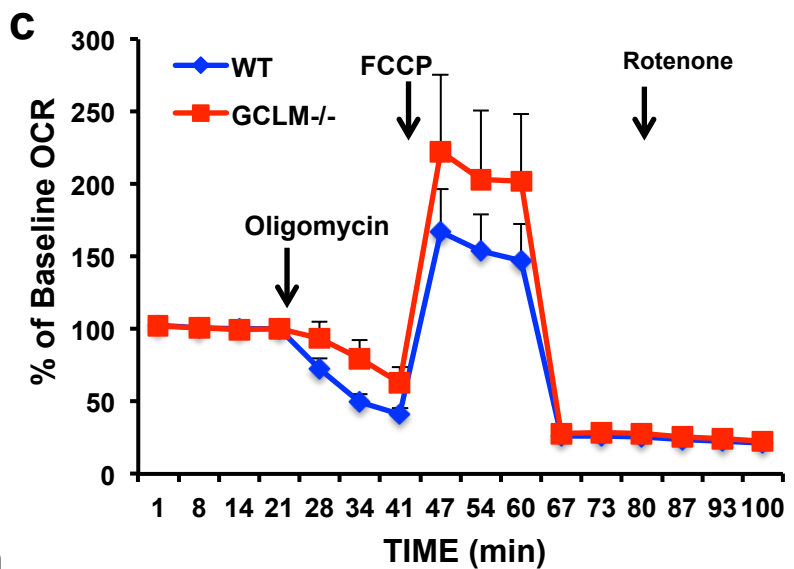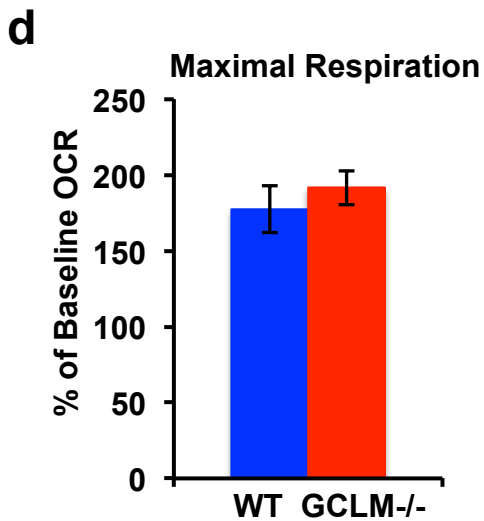

Supplement: cdd201636x2.pdf [file cdd201636x2.pdf]
